# Supplementary material for: In situ synthesis of a highly crystalline Tb-doped YAG nanophosphor using the mesopores of silica monoliths as a template
Source: Royal Society of Chemistry journal article supplement (doi:10.1039/c5tc00587f), 2015-01-01
Supplement: c5tc00587f1.pdf [file c5tc00587f1.pdf]

## ***In situ* synthesis of highly crystalline Tb-doped YAG nanophosphor using the mesopores of silica monolith as template**

Abdelhay Aboulaich, Nathalie Caperaa, Hicham El Hamzaoui, Bruno Capoen, Audrey Potdevin, Mohamed Bouazaoui, Geneviève Chadeyron\*, Rachid Mahiou

\* corresponding author

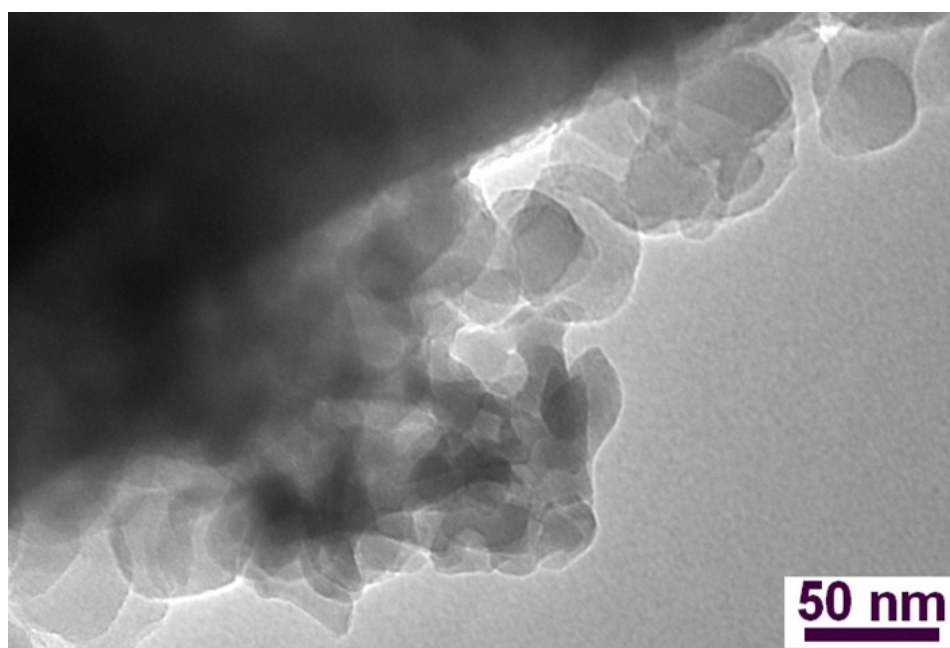

Figure S1. High magnification TEM image of grinded MSM-YAG:Tb nanocomposite

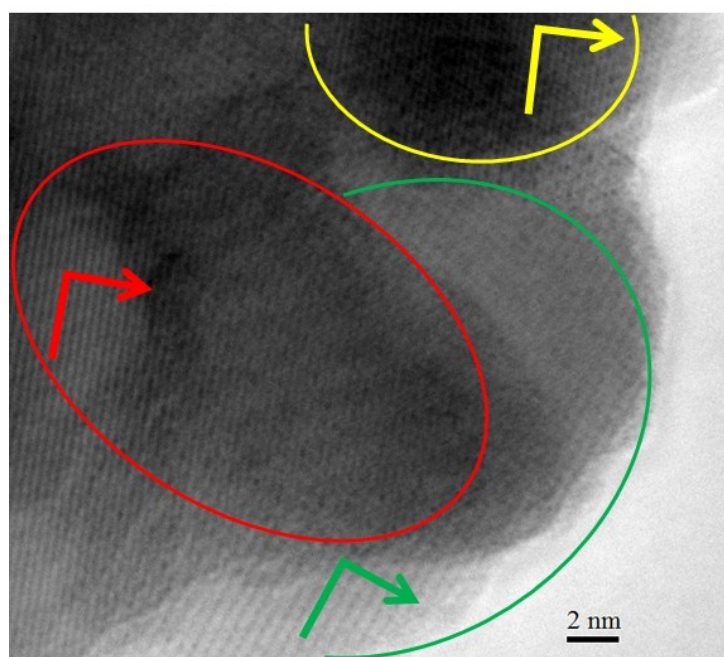

Figure S2. HRTEM image of MSM-YAG:Tb composite showing lattice fringes of (420)-yellow line, (321)-red line and (211) plans-green line of YAG structure.

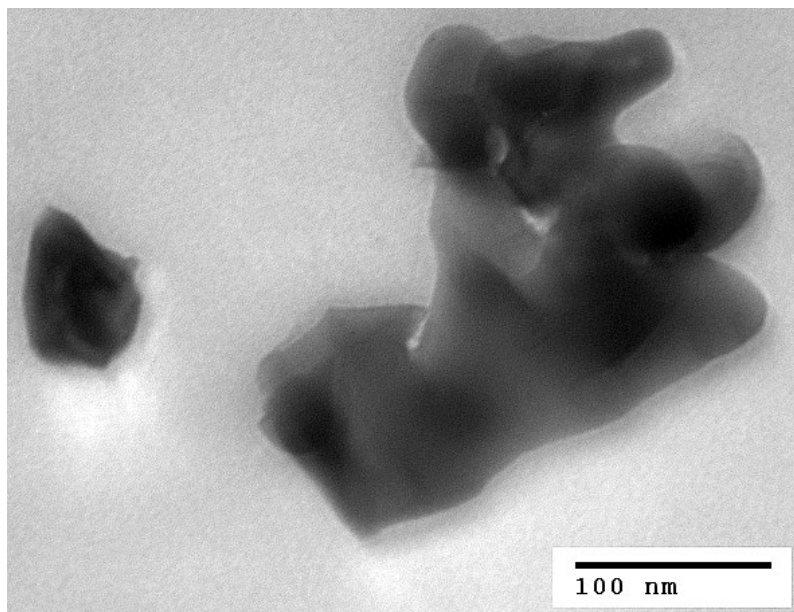

Figure S3. A representative TEM image of YAG:Tb crystalline powder
